# Supplementary material for: Celecoxib Nanoformulations with Enhanced Solubility, Dissolution Rate, and Oral Bioavailability: Experimental Approaches over In Vitro/In Vivo Evaluation
Source: MDPI journal article supplement (doi:10.3390/pharmaceutics15020363), 2023-01-20
Supplement: s1 [file s1]

**Table S1.** Dissolved amount of celecoxib in pH 12 and average particle size results.

| Formulation Code | Milling Composition | CXB/Excipient Weight Ratio | Dissolved amount of CXB in pH 12 at 60 min. | Particle Size (nm) |
|------------------|---------------------|----------------------------|---------------------------------------------|--------------------|
| F01              | CXB                 | 1                          | 2                                           | 606                |
| F02              | CXB:SLS             | 1:0,2                      | 9                                           | 494                |
| F03              | CXB:PVP K12         | 1:1                        | 100                                         | 486                |
| F04              | CXB:PVP K12:SLS     | 1:1:0,2                    | 100                                         | 420                |
| F05              | CXB:PVP K30         | 1:1                        | 90                                          | 502                |
| F06              | CXB:PVP K90         | 1:1                        | 86                                          | 512                |
| F07              | CXB:LHPC LH 21      | 1:2                        | 1                                           | 1020               |
| F08              | CXB:HEC             | 1:2                        | 14                                          | 894                |
| F09*             | CXB:HEC:SLS         | 1:2:0,2                    | -                                           | -                  |
| F10*             | CXB:HEC:PS40        | 1:2:0,2                    | -                                           | -                  |
| F11*             | CXB:HEC:SLS:PS40    | 1:2:0,2:0,2                | -                                           | -                  |
| F12              | CXB:LAC             | 1:2                        | 5                                           | 596                |
| F13              | CXB:LAC:SLS         | 1:2:0,2                    | 11                                          | 357                |
| F14              | CXB:LAC:SLS:PS40    | 1:8,6:0,2:0,2              | 20                                          | 425                |
| F15              | CXB:MAS             | 1:5                        | 1                                           | 485                |
| F16              | CXB:PVP-VA          | 2:1                        | 107                                         | 640                |
| F17              | CXB:PVP-VA:SLS      | 2:1                        | 110                                         | 595                |
| F18              | CXB:SOL             | 1:1                        | 13                                          | 487                |
| F19              | CXB:MAN             | 1:1                        | 4                                           | 1120               |
| F20              | CXB:PVP:MAN         | 1:1                        | 110                                         | 950                |
| F21              | CXB:PVP:MAN:SLS     | 1:1,5:0,5:0,2              | 120                                         | 350                |
| F22              | CXB:PVP:MAN:SLS     | 1:0,5:1,5:0,2              | 105                                         | 720                |

\*There is a chemical reaction between celecoxib and excipient. The products could not be analysed.

CXB: celecoxib, SLS: sodium lauryl sulfate, PVP: polyvinylpyrrolidone, L-HPC LH-21: low-substituted hydroxypropyl cellulose, HEC: hydroxyethyl cellulose, PS40: polyoxyl 40 stearate, LAC: lactose monohydrate, MAS: magnesium alumino metasilicate, PVP-VA: vinylpyrrolidone and vinyl acetate copolymer, SOL: Soluplus®, MAN: Mannitol.

**Table S2.** Dissolved amount of celecoxib in pH 1.2 + 0.2% SLS at 120 min.

| Formulation Code | Dissolved amount of celecoxib in pH 1.2 + 0.2% SLS at 120 min. |
|------------------|----------------------------------------------------------------|
| CXB pure powder  | 0.5                                                            |
| F03              | 2                                                              |
| F14              | 12.5                                                           |
| F20              | 15                                                             |
| F21              | 50                                                             |
| F22              | 30                                                             |

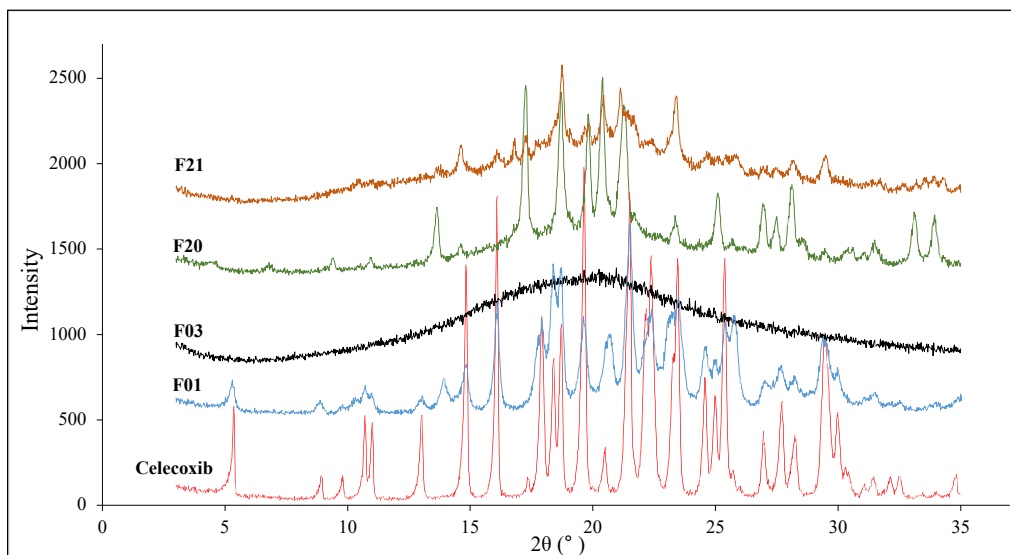

**Figure S1.** XRD diffractograms for celecoxib, F01, F03, F20, and F21.

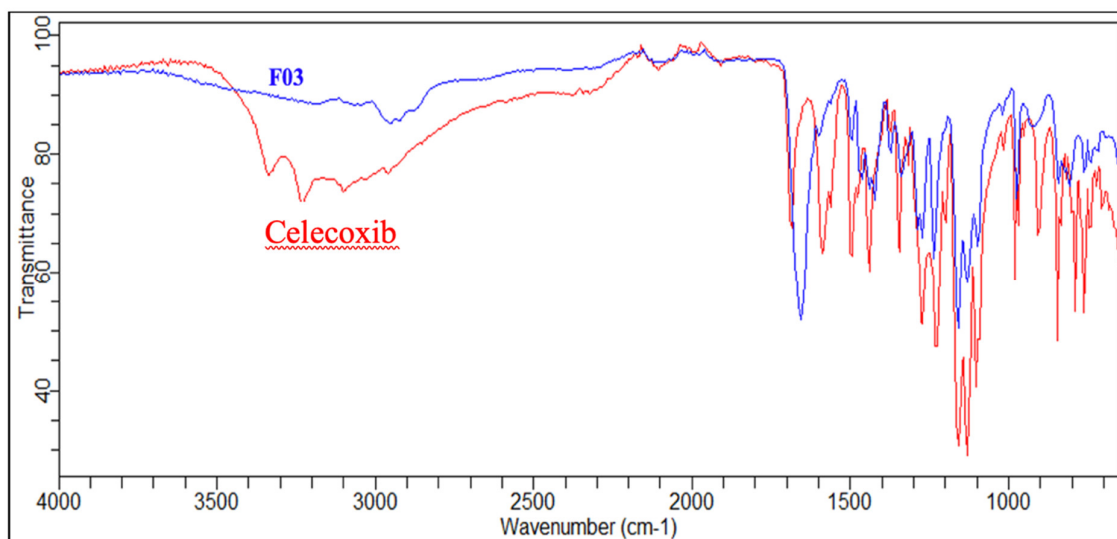

**Figure S2.** FTIR spectra for celecoxib and F03.

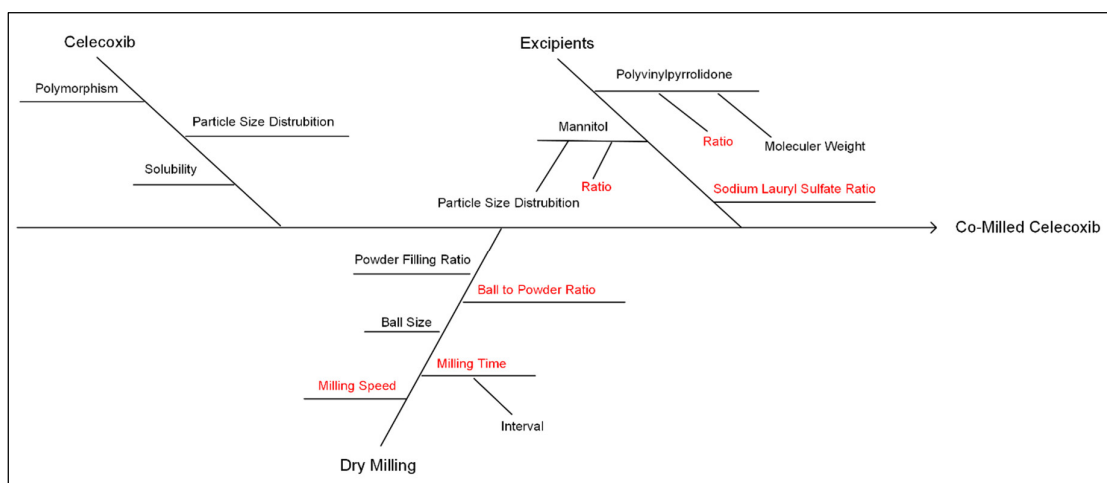

**Figure S3.** Ishikawa diagram of celecoxib co-milling process.

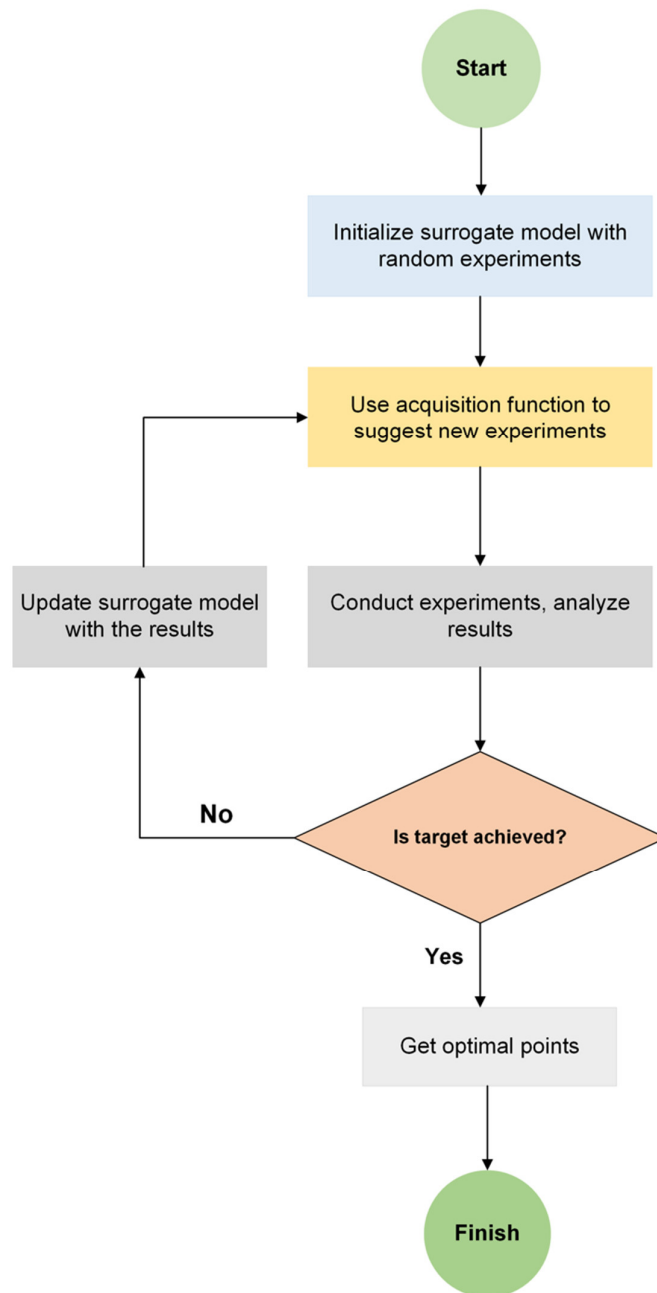

**Figure S4.** Bayesian Optimization flow chart.

**Table S3.** Plackett-Burman design and results.

| Run Order | Formulation Code | X <sub>1</sub> : Milling speed (rpm) | X <sub>2</sub> : Milling time (h) | X <sub>3</sub> : Ratio of ball weight to powder | X <sub>4</sub> : Ratio of PVP/CXB | X <sub>5</sub> : Ratio of SLS/CXB | X <sub>6</sub> : Ratio of MAN/CXB | Y <sub>1</sub> : Average particle size (nm) | Y <sub>2</sub> : The dissolved amount in pH 12 at 30 min. | Y <sub>3</sub> : The dissolved amount at pH 1.2 +0.2% SLS at 120 min. | Y <sub>4</sub> : The apparent solubility in water (µg/mL) |
|-----------|------------------|--------------------------------------|-----------------------------------|-------------------------------------------------|-----------------------------------|-----------------------------------|-----------------------------------|---------------------------------------------|-----------------------------------------------------------|-----------------------------------------------------------------------|-----------------------------------------------------------|
| 1         | PB01             | 250                                  | 1                                 | 5                                               | 0.5                               | 0                                 | 0.5                               | 980                                         | 4,1                                                       | 0,8                                                                   | 2,4                                                       |
| 2         | PB02             | 500                                  | 4                                 | 5                                               | 1.5                               | 0                                 | 0.5                               | 650                                         | 28,1                                                      | 1,3                                                                   | 2,6                                                       |
| 3         | PB03             | 500                                  | 1                                 | 15                                              | 1.5                               | 0                                 | 1.5                               | 821                                         | 67,5                                                      | 5                                                                     | 3,1                                                       |
| 4         | PB04             | 250                                  | 4                                 | 5                                               | 0.5                               | 0                                 | 1.5                               | 1100                                        | 29,2                                                      | 0,7                                                                   | 1,7                                                       |
| 5         | PB05             | 250                                  | 1                                 | 15                                              | 1.5                               | 0.2                               | 0.5                               | 350                                         | 73                                                        | 43,1                                                                  | 8,6                                                       |
| 6         | PB06             | 500                                  | 4                                 | 15                                              | 0.5                               | 0.2                               | 1.5                               | 720                                         | 64,2                                                      | 12                                                                    | 3,7                                                       |
| 7         | PB07             | 250                                  | 4                                 | 15                                              | 1.5                               | 0                                 | 1.5                               | 606                                         | 80,12                                                     | 18,9                                                                  | 4,3                                                       |
| 8         | PB08             | 250                                  | 1                                 | 5                                               | 1.5                               | 0.2                               | 1.5                               | 1240                                        | 36,42                                                     | 42                                                                    | 6,9                                                       |
| 9         | PB09             | 500                                  | 1                                 | 15                                              | 0.5                               | 0                                 | 0.5                               | 645                                         | 18,11                                                     | 1,2                                                                   | 2,5                                                       |
| 10        | PB10             | 250                                  | 4                                 | 15                                              | 0.5                               | 0.2                               | 0.5                               | 487                                         | 17,3                                                      | 5,9                                                                   | 3,1                                                       |
| 11        | PB11             | 500                                  | 4                                 | 5                                               | 1.5                               | 0.2                               | 0.5                               | 677                                         | 23,21                                                     | 5                                                                     | 3                                                         |
| 12        | PB12             | 500                                  | 1                                 | 5                                               | 0.5                               | 0.2                               | 1.5                               | 1012                                        | 16,27                                                     | 8                                                                     | 3,5                                                       |

**Table S4.** Statistical analysis of dependent variable values obtained by Plackett-Burman experimental design.

|                                                 | Y <sub>1</sub> : Average particle size (nm) |                | Y <sub>2</sub> : The dissolved amount in pH 12 at 30 min. |                | Y <sub>3</sub> : The dissolved amount at pH 1.2 +0.2% SLS at 120 min. |                | Y <sub>4</sub> : The apparent solubility in water (µg/mL) |                |
|-------------------------------------------------|---------------------------------------------|----------------|-----------------------------------------------------------|----------------|-----------------------------------------------------------------------|----------------|-----------------------------------------------------------|----------------|
|                                                 | Coefficient                                 | <i>p</i> Value | Coefficient                                               | <i>p</i> Value | Coefficient                                                           | <i>p</i> Value | Coefficient                                               | <i>p</i> Value |
| Constant                                        | 705,9                                       | 0,039          | 38,13                                                     | 0,042          | 11,99                                                                 | 0,046          | 3,783                                                     | 0,041          |
| X <sub>1</sub> : Milling speed (rpm)            | 31,6                                        | 0,350          | -1,90                                                     | 0,660          | -6,58                                                                 | 0,043          | -0,717                                                    | 0,070          |
| X <sub>2</sub> : Milling time (h)               | 17,4                                        | 0,594          | 2,23                                                      | 0,607          | -4,69                                                                 | 0,112          | -0,717                                                    | 0,070          |
| X <sub>3</sub> : Ratio of ball weight to powder | -101,1                                      | 0,022          | 15,24                                                     | 0,013          | 2,36                                                                  | 0,377          | 0,433                                                     | 0,223          |
| X <sub>4</sub> : Ratio of PVP:CXB               | -68,1                                       | 0,077          | 13,26                                                     | 0,022          | 7,23                                                                  | 0,031          | 0,967                                                     | 0,027          |
| X <sub>5</sub> : Ratio of SLS:CXB               | -11,1                                       | 0,732          | 0,27                                                      | 0,949          | 7,34                                                                  | 0,030          | 1,017                                                     | 0,022          |
| X <sub>6</sub> : Ratio of MAN:CXB               | 124,4                                       | 0,010          | 10,82                                                     | 0,045          | 2,44                                                                  | 0,362          | 0,083                                                     | 0,800          |

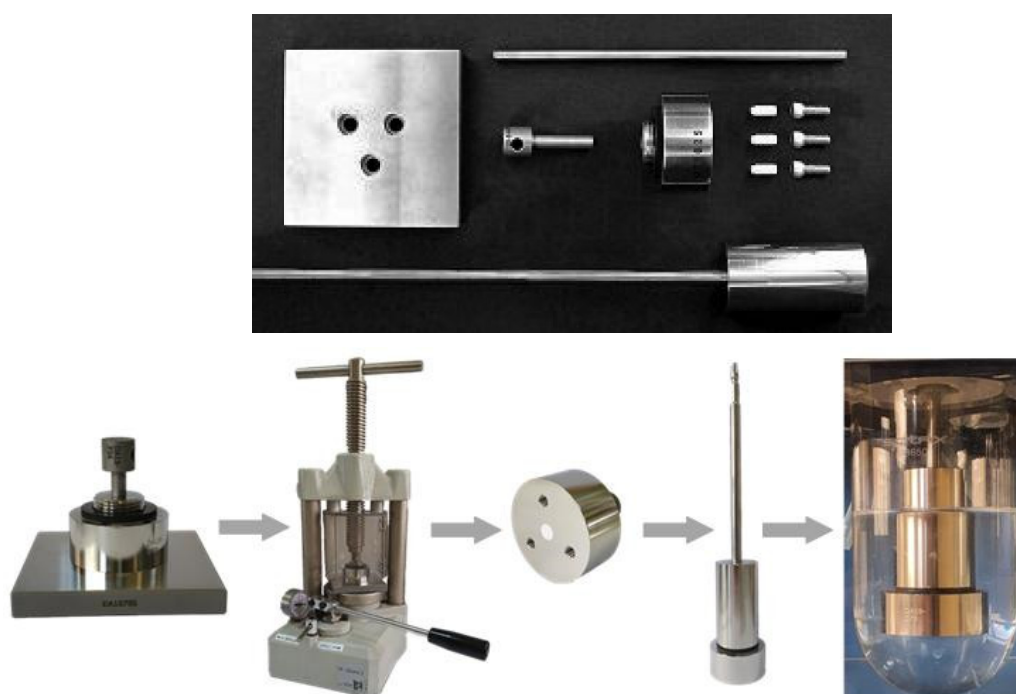

**Figure S5.** USP Wood Apparatus components, sample preparation.

**Table S5.** Celecoxib Nanoformulation and Celebrex® Capsule qualitative and quantitative composition.

| Components            | Celecoxib Nanoformulation (mg/capsule) | Celebrex® Capsule (mg/capsule) |
|-----------------------|----------------------------------------|--------------------------------|
| Co-milled Celecoxib*  | 640                                    | -                              |
| Celecoxib             | -                                      | 200                            |
| Croscarmellose Sodium | 8.1                                    | UNK                            |
| Magnesium Stearate    | 2.7                                    | UNK                            |
| Lactose monohydrate   | -                                      | 49.8                           |
| Sodium Lauryl Sulfate | -                                      | UNK                            |
| Polyvinylpyrrolidone  | -                                      | UNK                            |

\*It contains 200 mg of celecoxib

UNK: Unknown

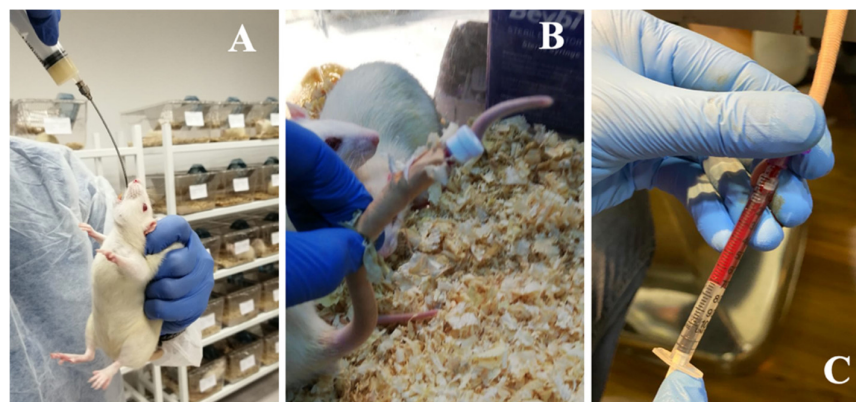

**Figure S6.** Images of drug administration (A) and tail vein blood collection (B and C) in rats

**Table S6.** Chromatographic conditions for the celecoxib assay method.

|                    |   |                                                                                                                                                             |
|--------------------|---|-------------------------------------------------------------------------------------------------------------------------------------------------------------|
| Column             | : | C18; 350 mm x 2,1 mm, 3 µm                                                                                                                                  |
| Flow rate          | : | 0.35 mL/min                                                                                                                                                 |
| Injection volume   | : | 10 µL                                                                                                                                                       |
| Column temperature | : | 40°C                                                                                                                                                        |
| Sample temperature | : | Ambient                                                                                                                                                     |
| Run time           | : | 7 min                                                                                                                                                       |
| Mobile Phase       | : | 0.1% formic acid in water (mobile phase A) and 0.1% formic acid in acetonitrile (mobile phase B)                                                            |
| Gradient elüsyon   |   | 0-1 min: 70% mobile phase A<br>1-2 min: 70% mobile phase A<br>2-3 min: 30% mobile phase A<br>4-4.1 min: 30% mobile phase A<br>4.1-7 min: 70% mobile phase A |

**Table S7.** MS/MS detection conditions for the celecoxib assay method.

---

|                                    |                                                                                                                                         |
|------------------------------------|-----------------------------------------------------------------------------------------------------------------------------------------|
| Ionization                         | : Negative                                                                                                                              |
| Interface voltage                  | : 4,5 kV                                                                                                                                |
| Nebulizer gas flow rate            | : 3 mL/min                                                                                                                              |
| Drying gas flow rate               | : 15 L/min                                                                                                                              |
| Desolvation line temperature       | : 250°C                                                                                                                                 |
| Heat block temperature             | : 400°C                                                                                                                                 |
| Multiple reaction monitoring (MRM) | : <i>Celecoxib</i> : 380,0 [M - H] <sup>-</sup> → 316,0 <i>m/z</i><br>Internal Standard: 557,20 [M - H] <sup>-</sup> → 397,1 <i>m/z</i> |
| Dwell time                         | : 200 <i>ms</i>                                                                                                                         |
| Collision energies (CE)            | : <i>Celecoxib</i> : 24 eV<br>Internal Standard: 31 eV                                                                                  |

---

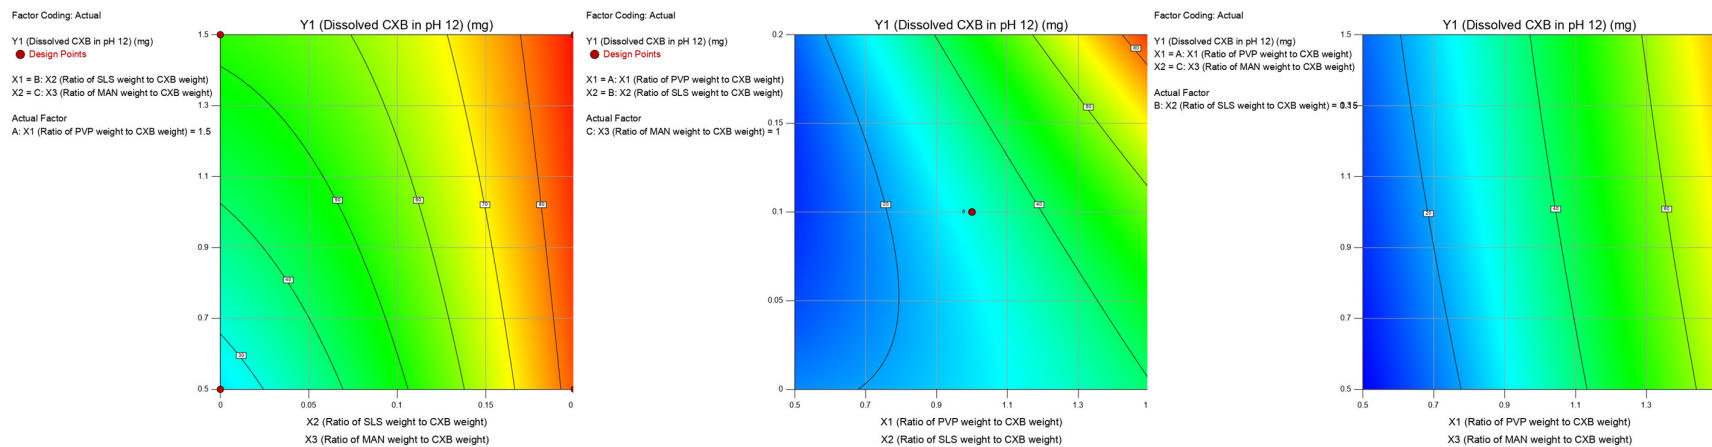

Figure S7. Contour plots for Y<sub>1</sub>.

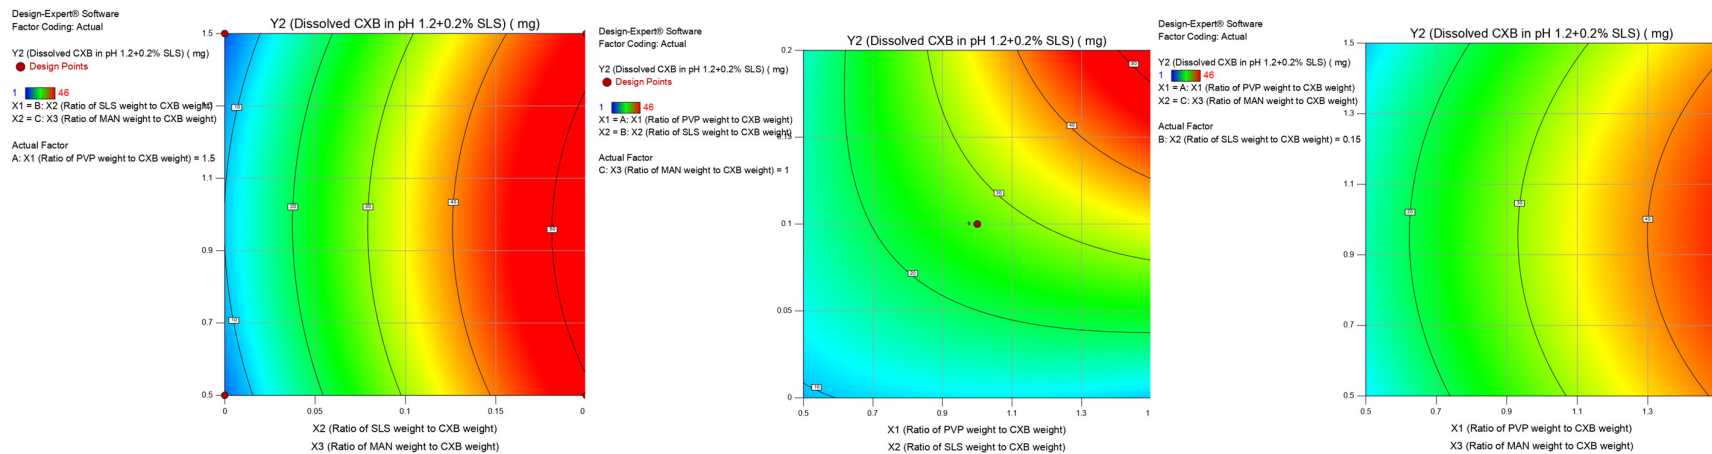

Figure S8. Contour plots for Y<sub>2</sub>.



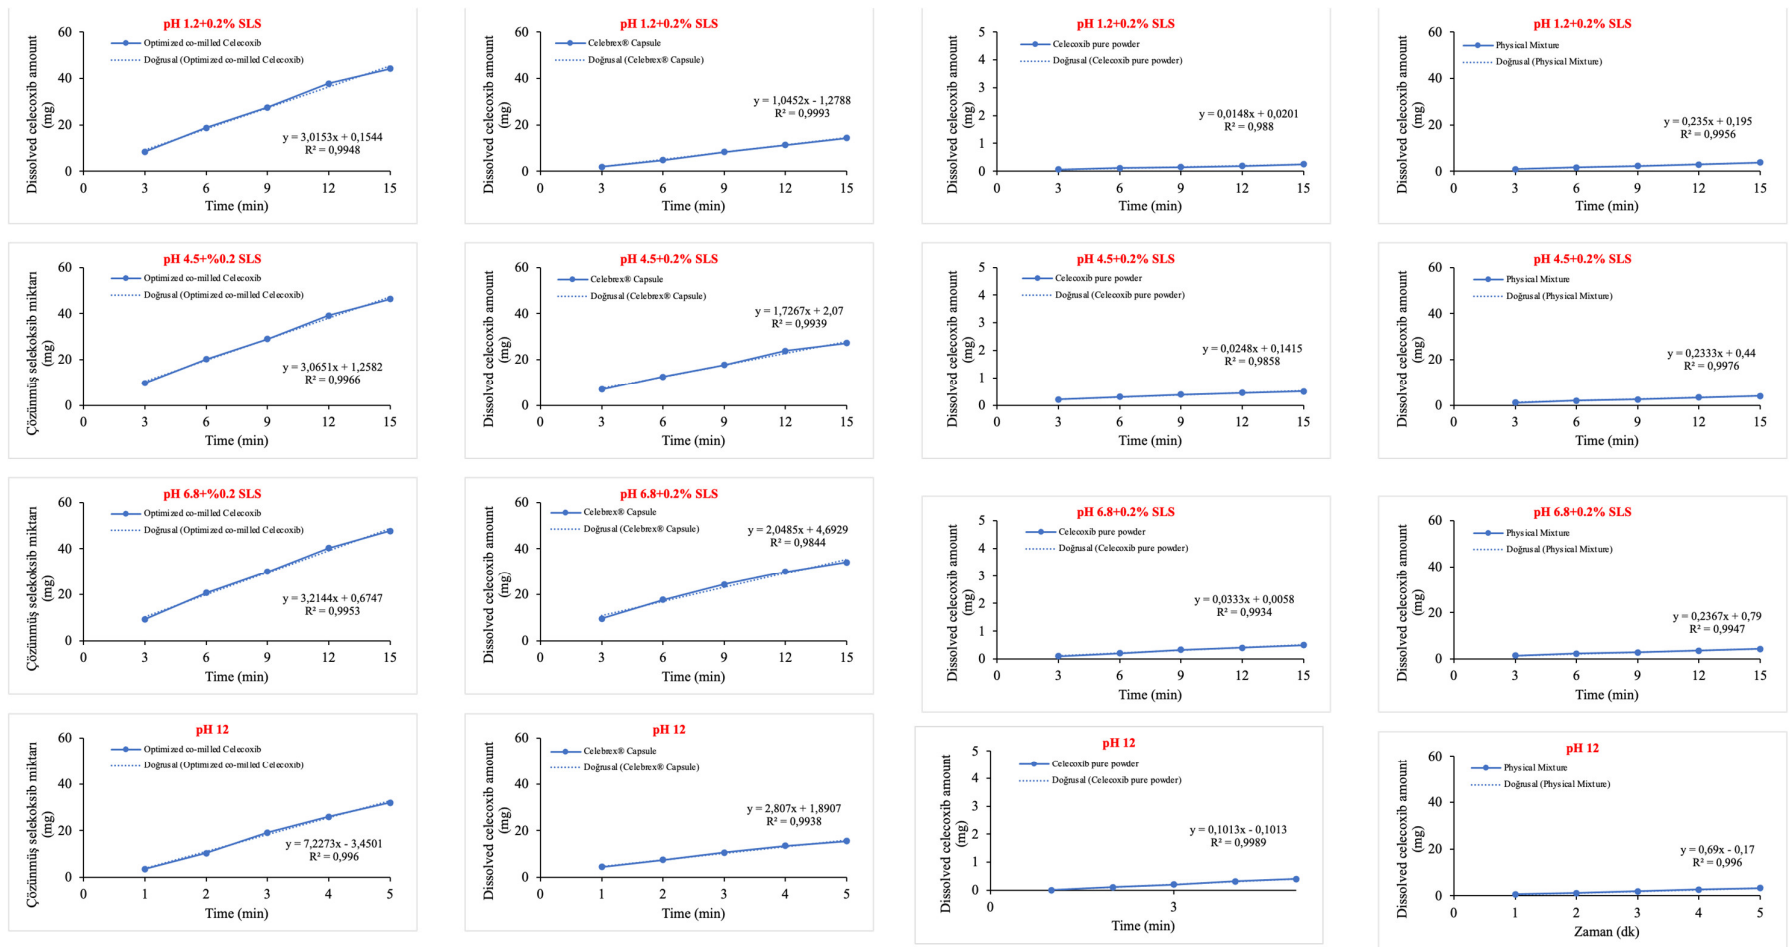

Figure S9. IDR regression graph and equation of regression.

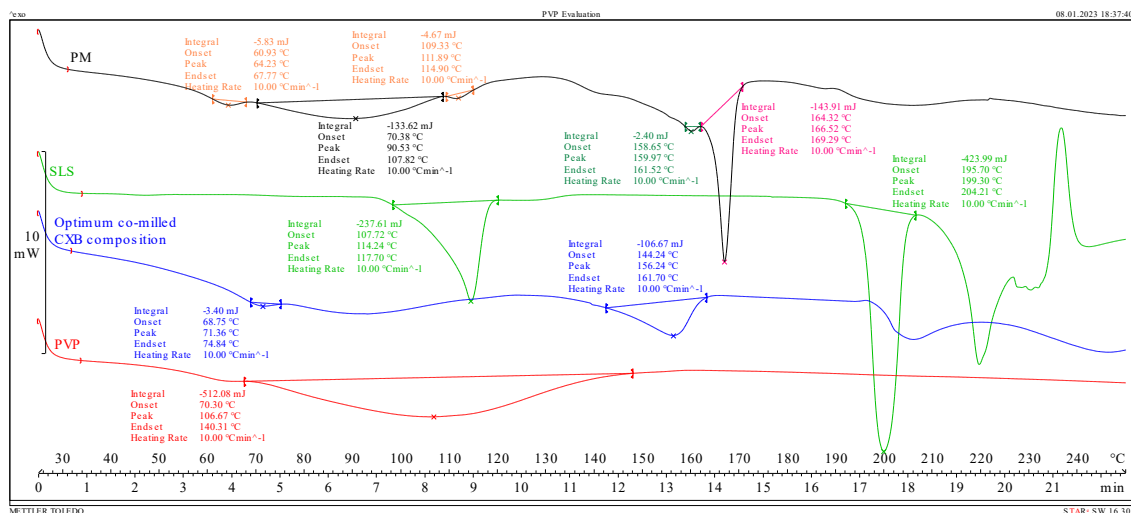

**Figure S10.** The DSC thermograms of physical mixture, SLS, optimum co-milled CXB composition and PVP.

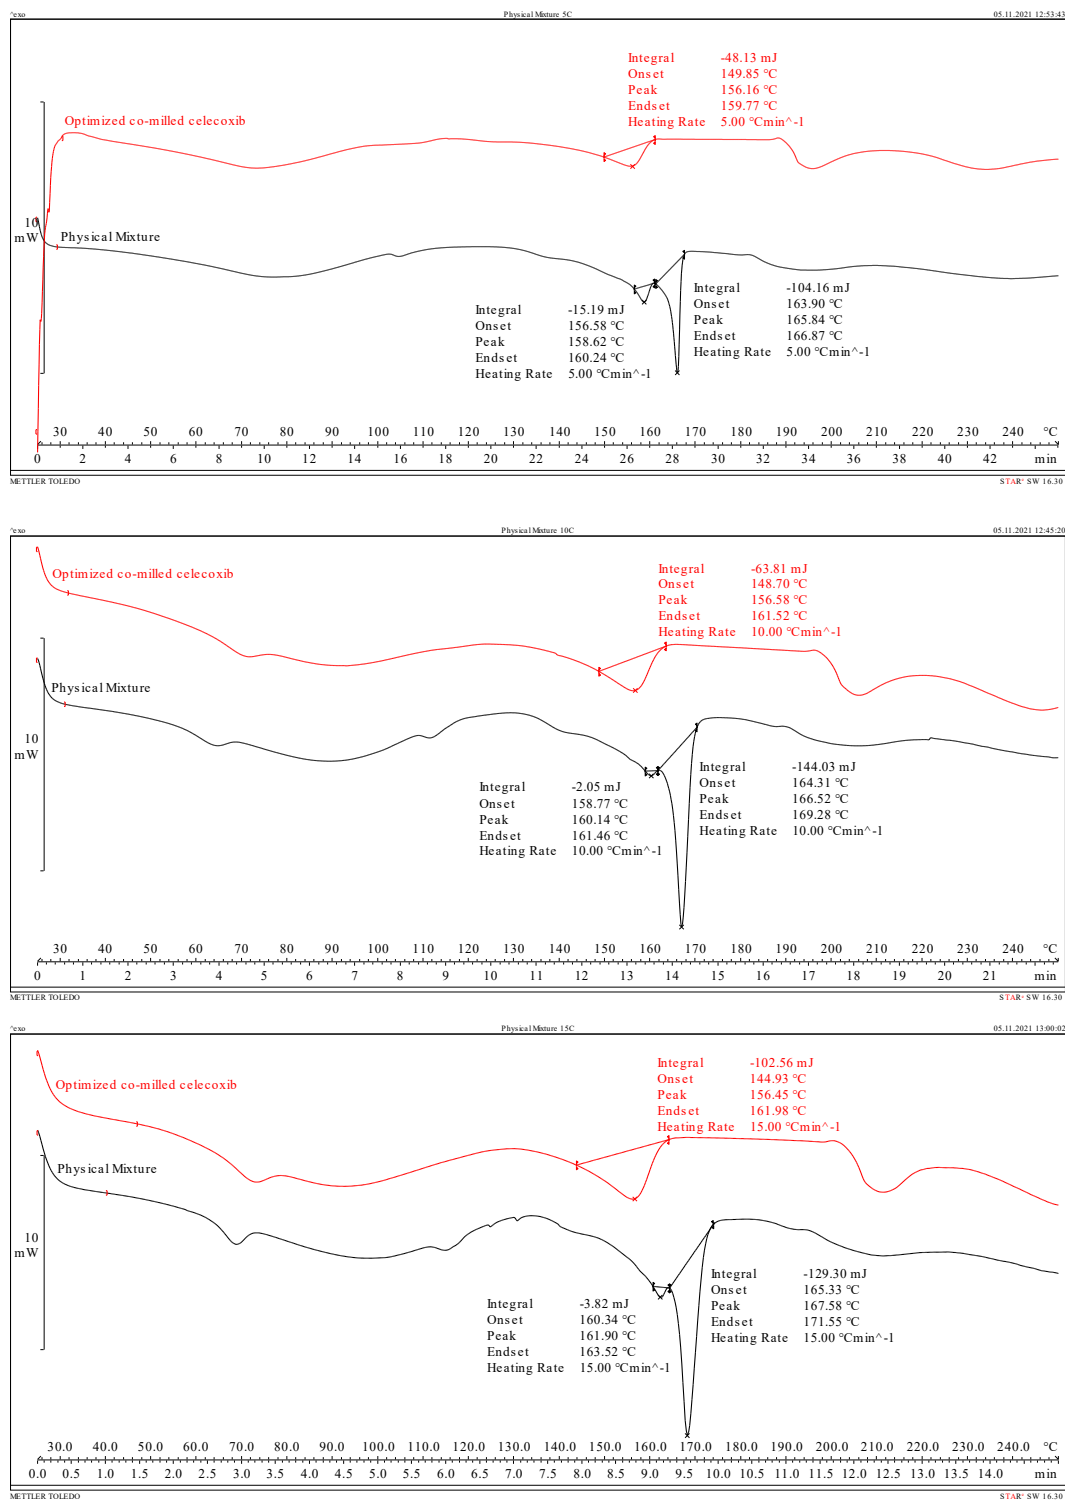

**Figure S11.** DSC thermograms of optimized co-milled celecoxib and physical mixture at different temperature increase rate).

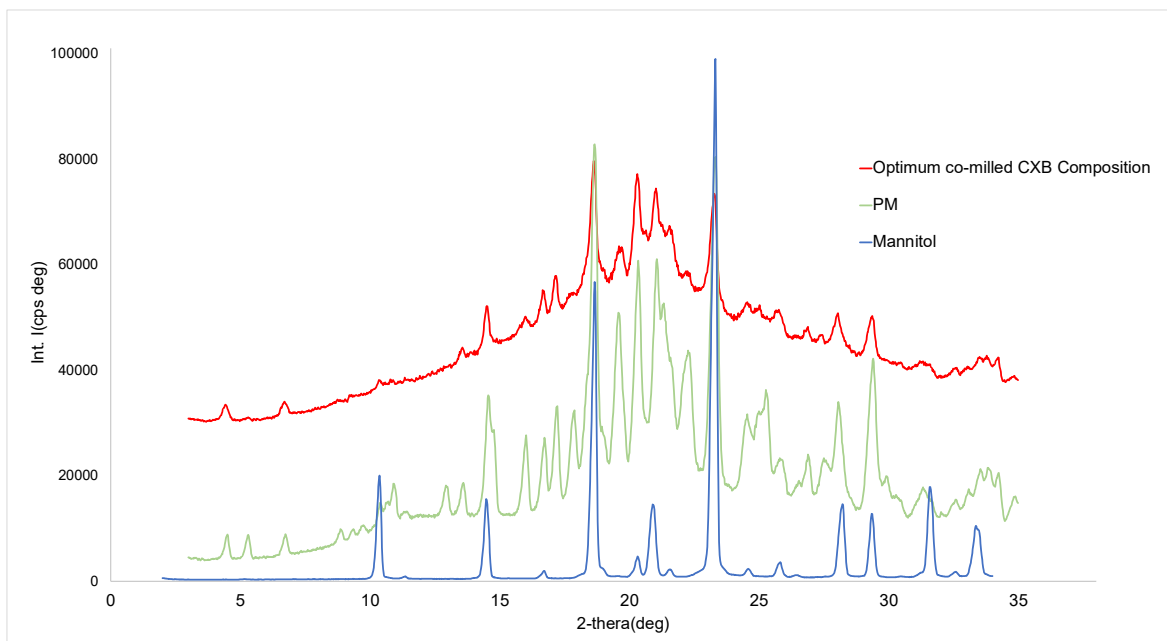

**Figure S12.** X-Ray Diffraction patterns of optimum co-milled celecoxib, PM and mannitol.

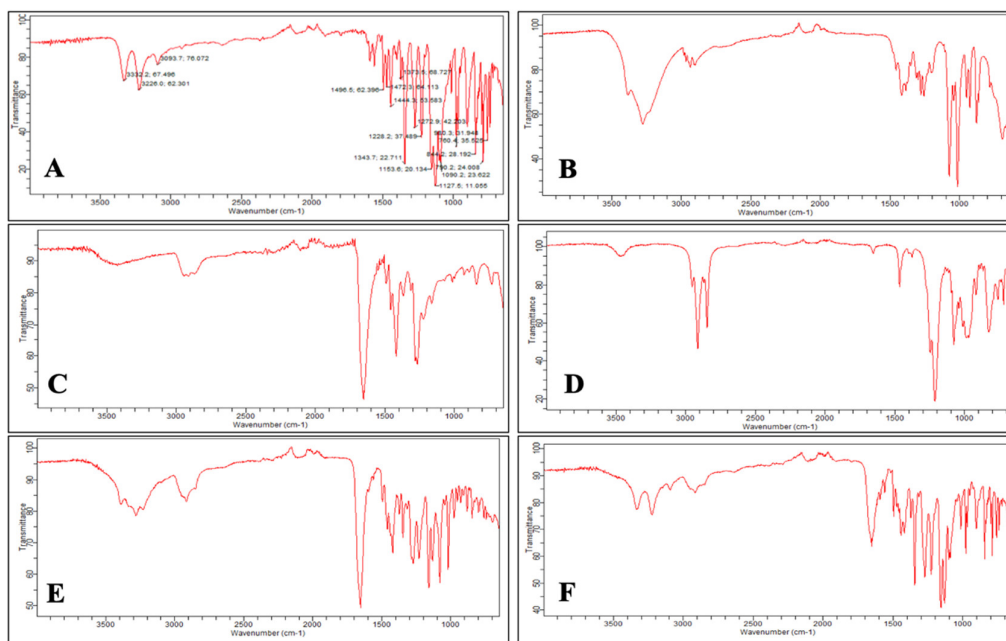

**Figure S13.** FTIR spectra: a) CXB b) MAN, c) PVP, d) SLS, e) optimum co-milled celecoxib composition, and f) physical mixture for optimum composition

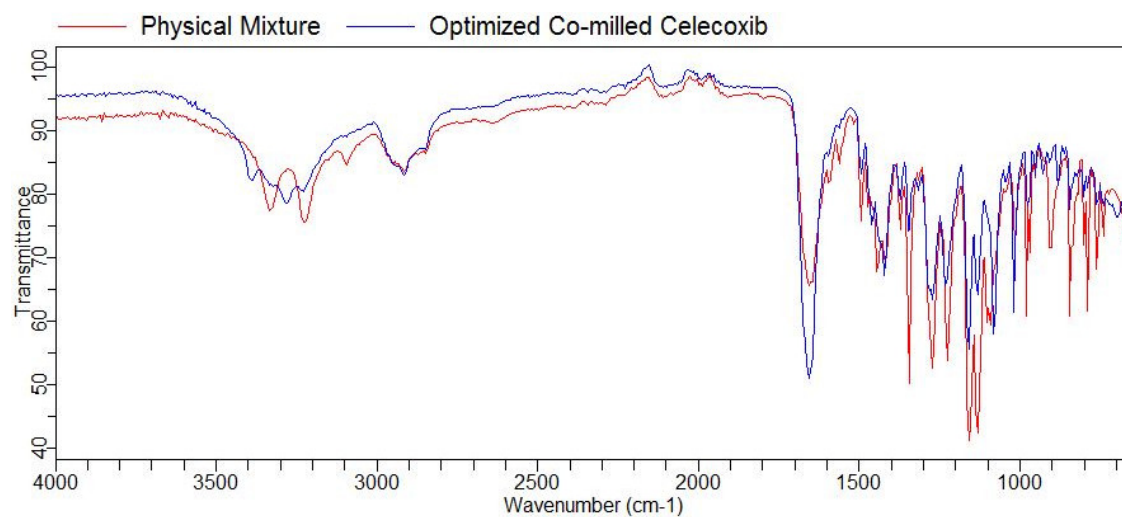

**Figure S14.** FTIR spectra of optimized co-milled celecoxib and physical mixture.

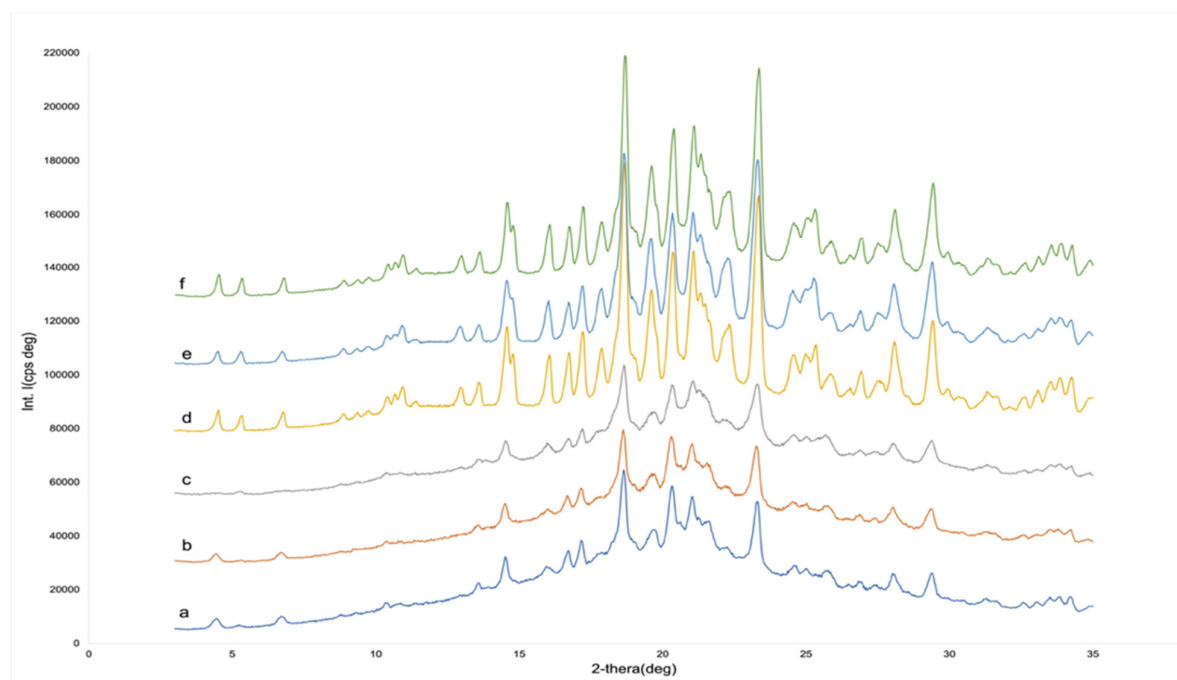

**Figure S15.** X-Ray Diffraction patterns of optimized co-milled celecoxib: (a) initial time (b), third month at 40°C, 75% RH, (c) third month at 25°C, 60% RH, and physical mixture: (d) initial time (e), third month at 40°C, 75% RH, (f) third month at 25°C, 60% RH).

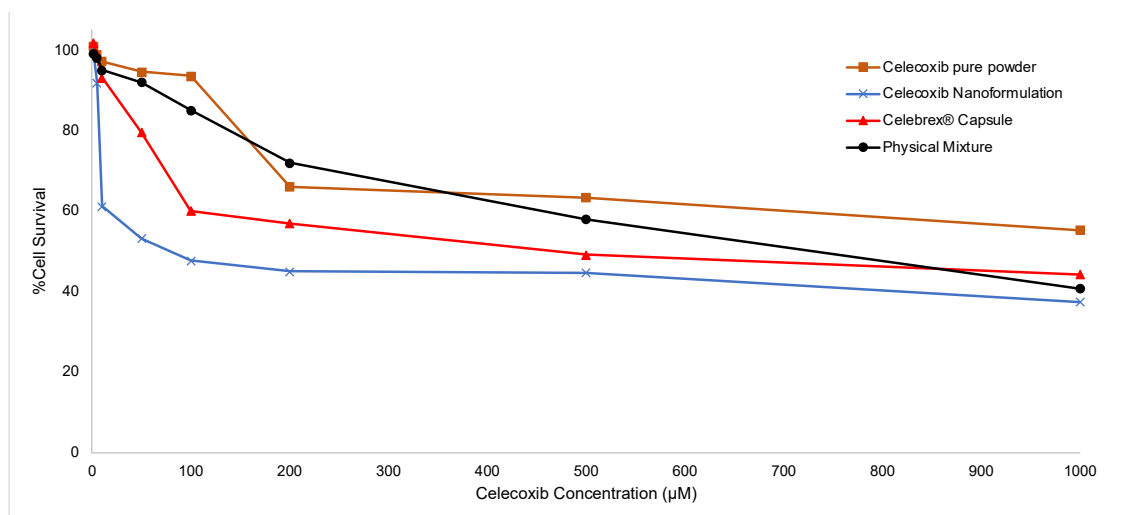

**Figure S16.** Percentage of cell survival for celecoxib pure powder, physical mixture, Celebrex® Capsule, and celecoxib nanoformulation at different concentrations of the samples for 4 h (mean  $\pm$  SD, n=6).

**Table S8.** Mean Papp of Celecoxib in the Direction of Apical to Basolateral (mean $\pm$  standard deviation, n=3).

| Formulation               | Paap (cm/s x 10 <sup>-6</sup> )<br>Absorptive (Apical to Basolateral) |
|---------------------------|-----------------------------------------------------------------------|
| Celecoxib Nanoformulation | 12,40 $\pm$ 3.12                                                      |
| Celebrex® Capsule         | 9,36 $\pm$ 1.61                                                       |
| Physical Mixture          | 3,32 $\pm$ 0.69                                                       |
| Pure Celecoxib Powder     | 0,52 $\pm$ 0,15                                                       |
